# Supplementary material
Source: Research Square preprint supplement (doi:10.21203/rs.3.rs-8694835/v1)
Supplement: Supplementary file 1 [file 5d316d7335d3792cc2c36582.docx]

| Time | Variables | n | Correlation coefficient (r) | 95% confidence interval | p value |
| --- | --- | --- | --- | --- | --- |
| LT | PTH, BA SDS | 32 | 0.25 | [-0.11; 0.552] | 0.164 |
| LT | PTH, BHI SDS | 31 | 0.31 | [-0.05; 0.602] | 0.085 |
| LT | BA SDS, BHI SDS | 35 | 0.36 | [0.03; 0.619] | 0.034 |
| LT | Height (percentile), BA SDS | 37 | 0.65 | [0.42; 0.806] | < 0.001 |
| LT | Height (percentile), BHI SDS | 35 | 0.36 | [0.04; 0.622] | 0.031 |
| Year 1 | PTH, BA SDS | 155 | -0.10 | [-0.26; 0.054] | 0.197 |
| Year 1 | PTH, BHI SDS | 148 | -0.07 | [-0.23; 0.090] | 0.379 |
| Year 1 | BA SDS, BHI SDS | 159 | 0.07 | [-0.09; 0.224] | 0.376 |
| Year 1 | Height (percentile), BA SDS | 156 | 0.40 | [0.25; 0.521] | < 0.001 |
| Year 1 | Height (percentile), BHI SDS | 149 | 0.15 | [-0.01; 0.304] | 0.067 |
| Year 3 | PTH, BA SDS | 119 | -0.32 | [-0.47; -0.146] | < 0.001 |
| Year 3 | PTH, BHI SDS | 118 | -0.18 | [-0.35; -0.002] | 0.047 |
| Year 3 | BA SDS, BHI SDS | 126 | -0.10 | [-0.27; 0.076] | 0.264 |
| Year 3 | Height (percentile), BA SDS | 120 | 0.31 | [0.14; 0.465] | < 0.001 |
| Year 3 | Height (percentile), BHI SDS | 119 | 0.15 | [-0.03; 0.318] | 0.113 |
| Year 5 | PTH, BA SDS | 106 | -0.30 | [-0.47; -0.120] | 0.002 |
| Year 5 | PTH, BHI SDS | 104 | 0.01 | [-0.18; 0.205] | 0.896 |
| Year 5 | BA SDS, BHI SDS | 115 | 0.04 | [-0.14; 0.225] | 0.641 |
| Year 5 | Height (percentile), BA SDS | 104 | 0.29 | [0.11; 0.459] | 0.003 |
| Year 5 | Height (percentile), BHI SDS | 103 | 0.07 | [-0.12; 0.264] | 0.453 |

Additional file 1: Observed correlations.
